# Supplementary material for: Electrophysiological correlates of semantic pain processing in the affective priming
Source: PubMed Central journal article supplement (PMC10516560; doi:10.3389/fpsyg.2023.1201581), 2023-09-08
Supplement: Table_1.pdf [file Table_1.pdf]

**Supplementary Table 1.** List of Italian words included in the stimulus sets. Words are divided into positive words, negative words not associated to pain, and negative words associated to pain and the English translation is reported.

| Positive words |             | Negative words not associated to pain |               | Negative words associated to pain |               |
|----------------|-------------|---------------------------------------|---------------|-----------------------------------|---------------|
| Italian        | English     | Italian                               | English       | Italian                           | English       |
| Agilità        | Agility     | Abbandonato                           | Abandoned     | Aggressione                       | Aggression    |
| Ambizione      | Ambition    | Alcolista                             | Alcoholic     | Amputazione                       | Amputation    |
| Ammirato       | Admired     | Angosciato                            | Anguished     | Atroce                            | Atrocious     |
| Amore          | Love        | Annoiato                              | Bored         | Cancro                            | Cancer        |
| Angelo         | Angel       | Ansioso                               | Anxious       | Dilaniante                        | Excruciating  |
| Appetitoso     | Luscious    | Arrabbiato                            | Angry         | Dolore                            | Pain          |
| Arte           | Art         | Assassino                             | Killer        | Ferita                            | Wound         |
| Atletica       | Athletics   | Avidità                               | Greed         | Fitta                             | Stabbing pain |
| Attracente     | Handsome    | Avversione                            | Hatred        | Frattura                          | Fracture      |
| Aurora         | Dawn        | Bastardo                              | Bastard       | Frustata                          | Lash          |
| Avventura      | Adventure   | Bestemmia                             | Blasphemy     | Incurabile                        | Incurable     |
| Beatitudine    | Bliss       | Bollente                              | Hot           | Infarto                           | Heart attack  |
| Bebè           | Baby        | Bomba                                 | Bomb          | Infiammazione                     | Inflammation  |
| Bellezza       | Beauty      | Carcere                               | Jail          | Lacerante                         | Lacerating    |
| Bello          | Beautiful   | Cattivo                               | Evil          | Lacerazione                       | Laceration    |
| Capace         | Capable     | Collera                               | Anger         | Lancinante                        | Stabbing      |
| Cascata        | Waterfall   | Colpevole                             | Guilty        | Lesione                           | Lesion        |
| Cervello       | Brain       | Corrotto                              | Corrupted     | Male                              | Pain          |
| Charme         | Charm       | Criminale                             | Criminal      | Mutilazione                       | Mutilation    |
| Ciclamino      | Cyclamen    | Crisi                                 | Crisis        | Piaga                             | Plague        |
| Comfort        | Comfort     | Debito                                | Debt          | Scorticamento                     | Flaying       |
| Conoscenza     | Knowledge   | Demonio                               | Demon         | Sevizia                           | Torture       |
| Coraggioso     | Brave       | Disastro                              | Disaster      | Sofferto                          | Suffered      |
| Cortese        | Kind        | Discarica                             | Dump          | Supplizio                         | Torment       |
| Curioso        | Curious     | Disgustato                            | Disgusted     | Tendinite                         | Tendinitis    |
| Delizia        | Delight     | Distruzione                           | Destruction   | Torturante                        | Torturing     |
| Desiderio      | Wish        | Drogato                               | Drug addicted | Traffiggente                      | Piercing      |
| Diamante       | Diamond     | Egoista                               | Selfish       | Traffittivo                       | Excruciating  |
| Dollaro        | Dollar      | Feccia                                | Scum          | Trauma                            | Trauma        |
| Dono           | Present     | Fetore                                | Stench        | Ulcera                            | Ulcer         |
| Eccellenza     | Excellence  | Frustrato                             | Frustrated    | Ulcerativo                        | Ulcerative    |
| Eccezionale    | Outstanding | Ghigliottina                          | Guillotine    | Ustione                           | Burn          |
| Eccitato       | Aroused     | Grasso                                | Fat           |                                   |               |
| Eccitazione    | Excitement  | Guerra                                | War           |                                   |               |
| Elegante       | Elegant     | Ignoranza                             | Ignorance     |                                   |               |
| Erotico        | Erotic      | Immaturo                              | Immature      |                                   |               |
| Estasi         | Ecstasy     | Immondizia                            | Dirty         |                                   |               |
| Esultante      | Elated      | Impaurito                             | Scared        |                                   |               |
| Fantasia       | Fantasy     | Impotente                             | Impotent      |                                   |               |
| Favore         | Favor       | Incidente                             | Accident      |                                   |               |
| Ferie          | Vacation    | Incubo                                | Nightmare     |                                   |               |
| Festivo        | Festive     | Infedele                              | Unfaithful    |                                   |               |
| Fiducioso      | Confident   | Inganno                               | Deceit        |                                   |               |
| Forte          | Strong      | Inondazione                           | Flood         |                                   |               |
| Fortunato      | Lucky       | Insicuro                              | Insecure      |                                   |               |
| Fratello       | Brother     | Inutile                               | Useless       |                                   |               |
| Giocattolo     | Toy         | Maleducato                            | Rude          |                                   |               |
| Gioioso        | Joyful      | Malvagio                              | Wicked        |                                   |               |
| Gioviale       | Jolly       | Maniaco                               | Maniac        |                                   |               |
| Giustizia      | Justice     | Marcio                                | Rotten        |                                   |               |
| Gloria         | Glory       | Minaccia                              | Threat        |                                   |               |
| Godimento      | Enjoyment   | Miseria                               | Misery        |                                   |               |
| Grato          | Grateful    | Muffa                                 | Mold          |                                   |               |
| Gusto          | Taste       | Nervoso                               | Nervous       |                                   |               |
| Idea           | Idea        | Obesità                               | Obesity       |                                   |               |
| Idolo          | Idol        | Odio                                  | Hate          |                                   |               |
| Incentivo      | Incentive   | Odioso                                | Obnoxious     |                                   |               |
| Interesse      | Interest    | Omicida                               | Murderer      |                                   |               |
| Ispirato       | Inspired    | Orrore                                | Horror        |                                   |               |
| Leale          | Loyal       | Ostile                                | Hostile       |                                   |               |
| Liberazione    | Liberty     | Penalità                              | Penalty       |                                   |               |
| Libertà        | Freedom     | Perdente                              | Loser         |                                   |               |
| Luminoso       | Bright      | Pericolo                              | Danger        |                                   |               |
| Lusso          | Luxury      | Pessimismo                            | Gloom         |                                   |               |

| Positive words |             | Negative words not associated to pain |             | Negative words associated to pain |  |
|----------------|-------------|---------------------------------------|-------------|-----------------------------------|--|
| Magico         | Magical     | Poverta                               | Poverty     |                                   |  |
| Magnifico      | Terrific    | Precipizio                            | Cliff       |                                   |  |
| Mente          | Mind        | Prigione                              | Prison      |                                   |  |
| Meraviglia     | Wonder      | Putrido                               | Putrid      |                                   |  |
| Milionario     | Millionaire | Puzza                                 | Stink       |                                   |  |
| Miracolo       | Miracle     | Rapimento                             | Abduction   |                                   |  |
| Mondo          | World       | Ratto                                 | Rat         |                                   |  |
| Natura         | Nature      | Respinto                              | Rejected    |                                   |  |
| Neonato        | Infant      | Ricatto                               | Blackmail   |                                   |  |
| Neve           | Snow        | Sanguinoso                            | Bloody      |                                   |  |
| Oceano         | Ocean       | Schiavo                               | Slave       |                                   |  |
| Onore          | Honor       | Sconfitto                             | Defeated    |                                   |  |
| Orgasmo        | Orgasm      | Scoraggiato                           | Discouraged |                                   |  |
| Oro            | Gold        | Sepoltura                             | Burial      |                                   |  |
| Ottimismo      | Optimism    | Sgradevole                            | Nasty       |                                   |  |
| Paradiso       | Paradise    | Sleale                                | Disloyal    |                                   |  |
| Passione       | Passion     | Solitudine                            | Loneliness  |                                   |  |
| Perspicacia    | Wit         | Spaventato                            | Scared      |                                   |  |
| Possibilita    | Chance      | Spazzatura                            | Garbage     |                                   |  |
| Prestigio      | Prestige    | Sporcizia                             | Filth       |                                   |  |
| Progresso      | Progress    | Sporco                                | Dirt        |                                   |  |
| Promozione     | Promotion   | Sudiciume                             | Grime       |                                   |  |
| Protetto       | Protected   | Terrorista                            | Terrorist   |                                   |  |
| Radio          | Radiant     | Terrorizzato                          | Terrified   |                                   |  |
| Regalo         | Gift        | Traditore                             | Traitor     |                                   |  |
| Ricchezza      | Riches      | Tragedia                              | Tragedy     |                                   |  |
| Ricco          | Wealthy     | Truffa                                | Fraud       |                                   |  |
| Ricompensa     | Reward      | Vandalo                               | Vandal      |                                   |  |
| Riconoscente   | Thankful    | Vigliacco                             | Louse       |                                   |  |
| Rinfresco      | Refreshment | Vittima                               | Victim      |                                   |  |
| Rispetto       | Respect     | Zanzara                               | Mosquito    |                                   |  |
| Romantico      | Romantic    |                                       |             |                                   |  |
| Saggio         | Wise        |                                       |             |                                   |  |
| Sesso          | Sex         |                                       |             |                                   |  |
| Seta           | Silk        |                                       |             |                                   |  |
| Sexy           | Sexy        |                                       |             |                                   |  |
| Sicuro         | Safe        |                                       |             |                                   |  |
| Soddisfatto    | Satisfied   |                                       |             |                                   |  |
| Soleggiato     | Sunlight    |                                       |             |                                   |  |
| Sorpreso       | Surprised   |                                       |             |                                   |  |
| Sorriso        | Grin        |                                       |             |                                   |  |
| Spensierato    | Carefree    |                                       |             |                                   |  |
| Speranza       | Hope        |                                       |             |                                   |  |
| Speranzoso     | Hopeful     |                                       |             |                                   |  |
| Sposa          | Bride       |                                       |             |                                   |  |
| Studio         | Scholar     |                                       |             |                                   |  |
| Successo       | Success     |                                       |             |                                   |  |
| Talento        | Talent      |                                       |             |                                   |  |
| Tesoro         | Treasure    |                                       |             |                                   |  |
| Trionfante     | Triumphant  |                                       |             |                                   |  |
| Trionfo        | Triumph     |                                       |             |                                   |  |
| Trofeo         | Trophy      |                                       |             |                                   |  |
| Umile          | Humble      |                                       |             |                                   |  |
| Utile          | Useful      |                                       |             |                                   |  |
| Vantaggio      | Advantage   |                                       |             |                                   |  |
| Vigoroso       | Vigorous    |                                       |             |                                   |  |
| Villaggio      | Village     |                                       |             |                                   |  |
| Villetta       | Cottage     |                                       |             |                                   |  |
| Vincitore      | Champion    |                                       |             |                                   |  |
| Virtu          | Virtue      |                                       |             |                                   |  |
| Vita           | Life        |                                       |             |                                   |  |
| Vittoria       | Victory     |                                       |             |                                   |  |
| Vivace         | Lively      |                                       |             |                                   |  |
| Vivo           | Alive       |                                       |             |                                   |  |
